# Supplementary material for: Membrane-mediated interactions between hinge-like particles
Source: Royal Society of Chemistry journal article supplement (doi:10.1039/d2sm00094f), 2022-01-01
Supplement: d2sm00094f1.pdf [file d2sm00094f1.pdf]

## Supplementary Information

### Membrane-mediated interactions between hinge-like particles

Bing Li and Steven M. Abel

#### 1 Supplemental figures

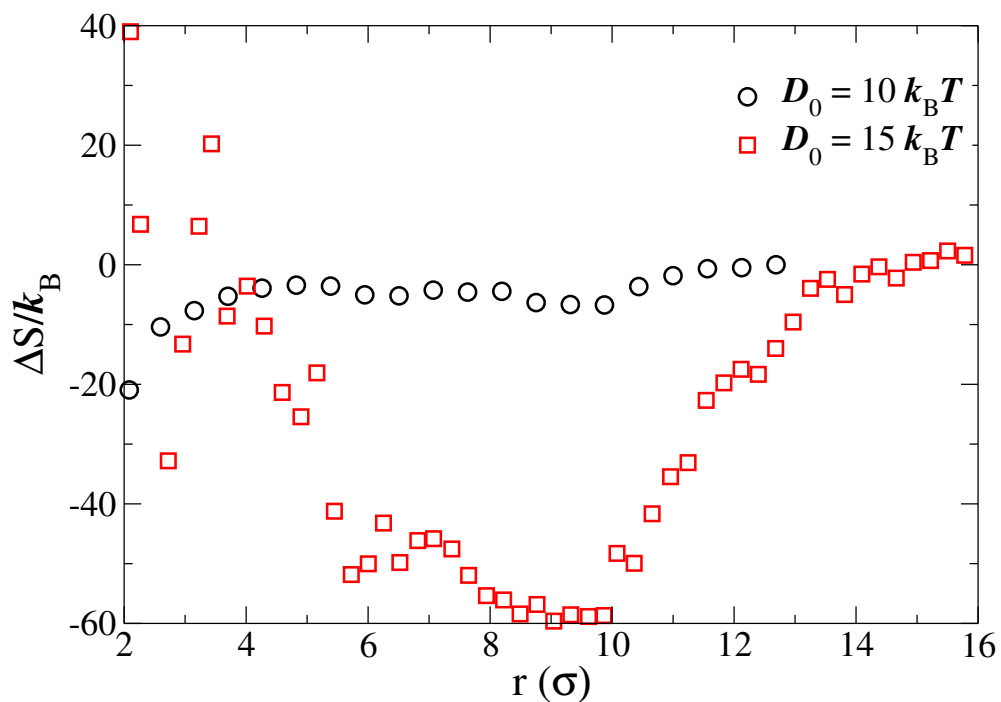

Figure 1: Entropic contributions ( $\Delta S$ ) to the effective free energy as a function of the distance ( $r$ ) between the centers of mass of the two hinges. Results are shown for flexible hinges ( $k_\theta = 0$ ) at two adsorption strengths.

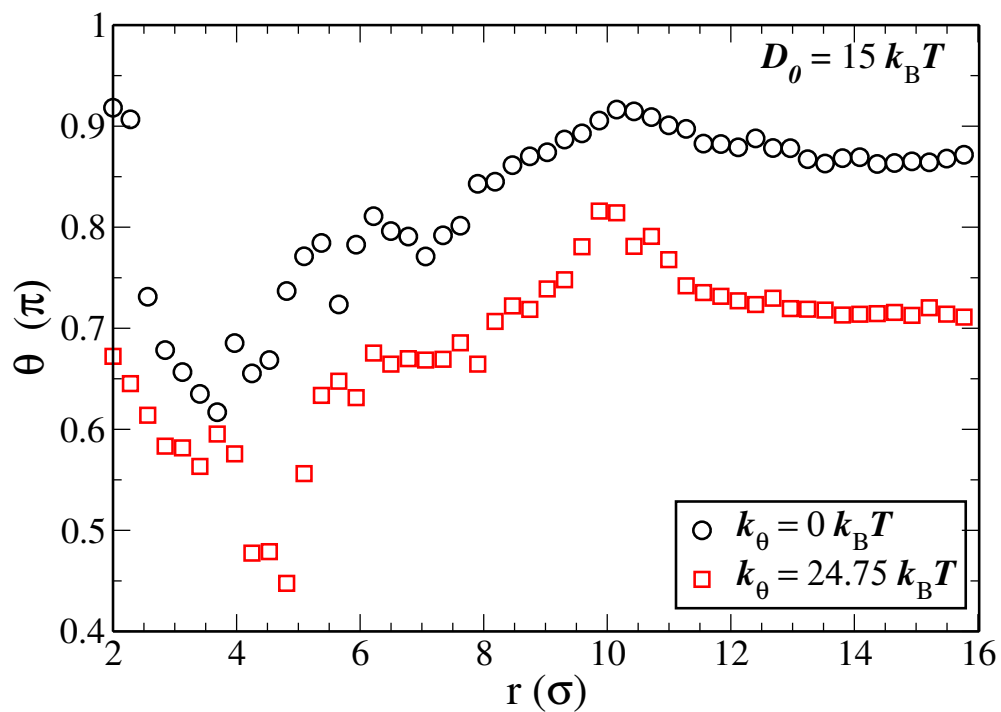

Figure 2: Average angle of the two hinges ( $\theta$ ) as a function of the distance ( $r$ ) between their centers of mass.
